# Supplementary material
Source: PubMed Central journal article supplement (PMC9851948)
Supplement: NIHMS1840813-supplement-supinfo.pdf [file NIHMS1840813-supplement-supinfo.pdf]

## Supplementary Material:

**Title:** Sex and smoking differences in the association between gastroesophageal reflux and risk of esophageal squamous cell carcinoma in a high-incidence area: Golestan Cohort Study.

**Authors:** Ali Soroush, Reza Malekzadeh, Gholamreza Roshandel, Masoud Khoshnia, Hossein Poustchi, Farin Kamangar, Paul Brennan, Paolo Boffetta, Sanford M Dawsey, Christian C Abnet, Julian A Abrams, Arash Etemadi

## Table of Contents:

|                  |                                                                                                                      |
|------------------|----------------------------------------------------------------------------------------------------------------------|
| <b>Table S1</b>  | Histologically confirmed ESCC tumor characteristics                                                                  |
| <b>Table S2a</b> | GERD Multivariable Logistic Regression, stratified by sex                                                            |
| <b>Table S2b</b> | GERD Multivariable Logistic Regression, stratified by tobacco smoking                                                |
| <b>Table S3</b>  | ESCC Risk Analysis – GERD symptom severity and duration                                                              |
| <b>Table S4</b>  | Sensitivity Analysis – Exclude all ESCC dx within 2 years after enrollment                                           |
| <b>Table S5</b>  | Sensitivity Analysis – Exclude all ESCC dx within 2 years after enrollment, but include all esophageal cancer tumors |

**Supplementary Tables:**

**Table S1.** Histologically confirmed ESCC tumor characteristics

|                           | <b>Entire cohort</b><br>(n=290) | <b>No GERD</b><br>(Reference)<br>(n=243) | <b>Any GERD</b><br>(n=47) | <b>Mixed symptoms</b><br>(n=34) | <b>Heartburn only</b><br>(n=13) |
|---------------------------|---------------------------------|------------------------------------------|---------------------------|---------------------------------|---------------------------------|
| <b>Location, n (%)</b>    |                                 |                                          |                           |                                 |                                 |
| Upper esophagus           | 30 (10.3%)                      | 21 (8.6%)                                | 9 (19.2%)                 | 5 (14.7%)                       | 4 (30.8%)                       |
| Mid esophagus             | 118 (40.7%)                     | 95 (39.1%)                               | 23 (48.9%)                | 17 (50.0%)                      | 6 (46.2%)                       |
| Lower esophagus           | 107 (36.9%)                     | 95 (39.1%)                               | 12 (25.5%)                | 9 (26.5%)                       | 3 (23.1%)                       |
| Unknown                   | 35 (12.1%)                      | 32 (13.2%)                               | 3 (6.4%)                  | 3 (8.8%)                        | 0 (0.0%)                        |
|                           |                                 |                                          | *                         |                                 | *                               |
| <b>Grade, n (%)</b>       |                                 |                                          |                           |                                 |                                 |
| Well differentiated       | 73 (25.2%)                      | 63 (25.9%)                               | 10 (21.3%)                | 8 (23.5%)                       | 2 (15.4%)                       |
| Moderately differentiated | 52 (17.9%)                      | 43 (17.7%)                               | 9 (19.2%)                 | 7 (20.6%)                       | 2 (15.4%)                       |
| Poorly differentiated     | 11 (3.8%)                       | 9 (3.7%)                                 | 2 (4.3%)                  | 2 (5.9%)                        | 0 (0.0%)                        |
| Unknown                   | 154 (53.1%)                     | 128 (52.7%)                              | 26 (55.3%)                | 17 (50.0%)                      | 9 (69.2%)                       |
| <b>Metastasis, n (%)</b>  |                                 |                                          |                           |                                 |                                 |
| Yes                       | 13 (4.5%)                       | 12 (4.9%)                                | 1 (2.1%)                  | 0 (0.0%)                        | 1 (7.7%)                        |
| Unknown                   | 277 (95.5%)                     | 231 (95.1%)                              | 46 (97.9%)                | 34 (100.0%)                     | 12 (92.3%)                      |

\*\* p<0.01, \*p<0.05

|                           | <b>Entire cohort</b><br>(n=290) | <b>Female</b><br>(Reference)<br>(n=141) | <b>Male</b><br>(n=149) |
|---------------------------|---------------------------------|-----------------------------------------|------------------------|
| <b>Location, n (%)</b>    |                                 |                                         |                        |
| Upper esophagus           | 30 (10.8%)                      | 19 (13.5%)                              | 11 (7.4%)              |
| Mid esophagus             | 118 (40.7%)                     | 59 (41.8%)                              | 59 (39.6%)             |
| Lower esophagus           | 107 (36.9%)                     | 41 (29.1%)                              | 66 (44.3%)             |
| Unknown                   | 35 (12.1%)                      | 22 (15.6%)                              | 13 (8.7%)              |
|                           |                                 |                                         | *                      |
| <b>Grade, n (%)</b>       |                                 |                                         |                        |
| Well differentiated       | 73 (25.2%)                      | 36 (25.5%)                              | 37 (24.8%)             |
| Moderately differentiated | 52 (17.9%)                      | 22 (15.6%)                              | 30 (20.1%)             |
| Poorly differentiated     | 11 (3.8%)                       | 6 (4.3%)                                | 5 (3.4%)               |
| Unknown                   | 154 (53.1%)                     | 77 (54.6%)                              | 77 (51.7%)             |
| <b>Metastasis, n (%)</b>  |                                 |                                         |                        |
| Yes                       | 13 (4.5%)                       | 9 (6.4%)                                | 4 (2.7%)               |
| Unknown                   | 277 (95.5%)                     | 132 (93.6%)                             | 145 (97.3%)            |

\*\* p<0.01, \*p<0.05

|                           | <b>Entire cohort</b><br>(n=290) | <b>Never Smoker</b><br>(Reference)<br>(n=231) | <b>Ever Smoker</b><br>(n=59) |
|---------------------------|---------------------------------|-----------------------------------------------|------------------------------|
| <b>Location, n (%)</b>    |                                 |                                               |                              |
| Upper esophagus           | 30 (10.8%)                      | 30 (13.0%)                                    | 0 (0.0%)                     |
| Mid esophagus             | 118 (40.7%)                     | 95 (41.1%)                                    | 23 (39.0%)                   |
| Lower esophagus           | 107 (36.9%)                     | 77 (33.3%)                                    | 30 (50.9%)                   |
| Unknown                   | 35 (12.1%)                      | 29 (12.6%)                                    | 6 (10.2%)                    |
|                           |                                 |                                               | **                           |
| <b>Grade, n (%)</b>       |                                 |                                               |                              |
| Well differentiated       | 73 (25.2%)                      | 52 (22.5%)                                    | 21 (35.6%)                   |
| Moderately differentiated | 52 (17.9%)                      | 38 (16.5%)                                    | 14 (23.7%)                   |
| Poorly differentiated     | 11 (3.8%)                       | 10 (4.3%)                                     | 1 (1.7%)                     |
| Unknown                   | 154 (53.1%)                     | 131 (56.7%)                                   | 23 (38.9%)                   |
|                           |                                 |                                               | *                            |
| <b>Metastasis, n (%)</b>  |                                 |                                               |                              |
| Yes                       | 13 (4.5%)                       | 10 (4.3%)                                     | 3 (5.1%)                     |
| Unknown                   | 277 (95.5%)                     | 221 (95.7%)                                   | 56 (94.9%)                   |

\*\* p<0.01, \*p<0.05

**Table S2a.** GERD Multivariable Logistic Regression, stratified by sex

|                                                 | <u>Any GERD</u>        |                        | <u>Mixed symptoms</u>  |                        | <u>Heartburn alone</u> |                               |
|-------------------------------------------------|------------------------|------------------------|------------------------|------------------------|------------------------|-------------------------------|
|                                                 | Male                   | Female                 | Male                   | Female                 | Male                   | Female                        |
|                                                 | aOR (95% CI)                  |
| <b>Age, per 10 year increase</b>                | 0.97 (0.93-1.02)       | 1.07 (1.03-1.10)**     | 0.95 (0.90-1.00)       | 1.09 (1.04-1.13)**     | 1.02 (0.94-1.10)       | 1.01 (0.94-1.08)              |
| <b>Residence</b>                                |                        |                        |                        |                        |                        |                               |
| Rural                                           | Reference              | Reference              | Reference              | Reference              | Reference              | Reference                     |
| Urban                                           | 1.12 (0.99-1.28)       | 0.93 (0.86-1.02)       | 1.11 (0.95-1.29)       | 0.77 (0.70-0.85)**     | 1.18 (0.95-1.47)       | 1.63 (1.40-1.90) <sup>2</sup> |
| <b>Ethnicity</b>                                |                        |                        |                        |                        |                        |                               |
| Turkmen                                         | Reference              | Reference              | Reference              | Reference              | Reference              | Reference                     |
| Non-Turkmen                                     | 1.73 (1.57-1.90)**     | 1.46 (1.36-1.56)**     | 1.79 (1.61-2.00)**     | 1.48 (1.37-1.60)**     | 1.59 (1.34-1.87)**     | 1.42 (1.25-1.60)**            |
| <b>Socioeconomic status</b>                     |                        |                        |                        |                        |                        |                               |
| 1 <sup>st</sup> quartile (lowest)               | Reference              | Reference              | Reference              | Reference              | Reference              | Reference                     |
| 2 <sup>nd</sup> quartile                        | 0.89 (0.79-0.99)       | 0.93 (0.87-1.01)       | 0.89 (0.78-1.02)       | 0.97 (0.89-1.06)       | 0.89 (0.73-1.08)       | 0.84 (0.73-0.97)              |
| 3 <sup>rd</sup> quartile                        | 0.87 (0.78-0.97)       | 0.88 (0.81-0.95)       | 0.88 (0.77-1.00)       | 0.93 (0.86-1.02)       | 0.86 (0.71-1.04)       | 0.74 (0.64-0.86)              |
| 4 <sup>th</sup> quartile (highest)              | 0.60 (0.53-0.69)<br>** | 0.69 (0.63-0.75)<br>** | 0.56 (0.48-0.66)<br>** | 0.69 (0.63-0.77)<br>** | 0.69 (0.56-0.86)<br>** | 0.67 (0.57-0.79)<br>**        |
| <b>BMI, n (%)</b>                               |                        |                        |                        |                        |                        |                               |
| < 18.5                                          | 1.03 (0.87-1.22)       | 1.12 (0.97-1.30)       | 1.11 (0.92-1.34)       | 1.11 (0.94-1.31)       | 0.87 (0.64-1.19)       | 1.17 (0.91-1.51)              |
| 18.5-24.9                                       | Reference              | Reference              | Reference              | Reference              | Reference              | Reference                     |
| 25.0-29.9                                       | 1.08 (0.97-1.21)       | 0.90 (0.83-0.97)       | 1.01 (0.88-1.16)       | 0.89 (0.82-0.97)       | 1.25 (1.03-1.51)       | 0.92 (0.80-1.06)              |
| >30                                             | 1.11 (0.95-1.31)       | 0.92 (0.85-1.01)<br>*  | 1.05 (0.87-1.27)       | 0.93 (0.85-1.03)       | 1.27 (0.97-1.66)<br>*  | 0.90 (0.77-1.05)              |
| <b>WHR, per SD</b>                              | 0.94 (0.88-0.99)*      | 1.11 (1.07-1.15)**     | 0.95 (0.89-1.01)       | 1.15 (1.10-1.19)**     | 0.91 (0.83-1.00)       | 1.01 (0.95-1.08)              |
| <b>Temperature of tea consumed</b>              |                        |                        |                        |                        |                        |                               |
| < 60° C                                         | Reference              | Reference              | Reference              | Reference              | Reference              | Reference                     |
| ≥ 60° C                                         | 1.06 (0.97-1.16)       | 1.05 (0.99-1.11)       | 1.05 (0.94-1.17)       | 0.99 (0.93-1.06)       | 1.08 (0.92-1.26)       | 1.26 (1.13-1.40)              |
| Unknown                                         | 1.47 (1.04-2.09)       | 1.42 (1.11-1.81)<br>*  | 1.65 (1.12-2.44)       | 1.47 (1.13-1.91)       | 1.05 (0.53-2.10)       | 1.22 (0.75-1.99)<br>**        |
| <b>Fruit and vegetable consumption, n (%)</b>   |                        |                        |                        |                        |                        |                               |
| 1 <sup>st</sup> quintile (lowest)               | Reference              | Reference              | Reference              | Reference              | Reference              | Reference                     |
| 2 <sup>nd</sup> quintile                        | 0.88 (0.77-0.99)       | 0.87 (0.80-0.95)       | 0.88 (0.76-1.02)       | 0.89 (0.81-0.97)       | 0.86 (0.68-1.08)       | 0.84 (0.73-0.98)              |
| 3 <sup>rd</sup> quintile                        | 0.86 (0.76-0.98)       | 0.82 (0.75-0.89)       | 0.88 (0.76-1.03)       | 0.84 (0.76-0.92)       | 0.81 (0.64-1.02)       | 0.77 (0.66-0.90)              |
| 4 <sup>th</sup> quintile                        | 0.77 (0.67-0.88)       | 0.77 (0.70-0.84)       | 0.69 (0.58-0.80)       | 0.80 (0.72-0.88)       | 0.96 (0.77-1.20)       | 0.69 (0.59-0.82)              |
| 5 <sup>th</sup> quintile (highest)              | 0.67 (0.58-0.77)       | 0.67 (0.61-0.74)       | 0.60 (0.51-0.70)       | 0.67 (0.60-0.75)       | 0.84 (0.67-1.05)       | 0.69 (0.58-0.82)              |
| Unknown                                         | 0.24 (0.14-0.42)<br>** | 0.21 (0.15-0.30)<br>** | 0.24 (0.13-0.45)<br>** | 0.22 (0.15-0.32)<br>** | 0.27 (0.09-0.70)       | 0.19 (0.09-0.41)<br>**        |
| <b>Current exposure to indoor air pollution</b> |                        |                        |                        |                        |                        |                               |
| No                                              | Reference              | Reference              | Reference              | Reference              | Reference              | Reference                     |
| Yes                                             | 0.96 (0.87-1.04)       | 0.96 (0.90-1.02)       | 0.90 (0.81-0.99)       | 0.89 (0.83-0.96)       | 1.09 (0.94-1.27)       | 1.21 (1.08-1.36)              |
| Unknown                                         | 1.15 (0.70-1.88)       | 0.86 (0.67-1.10)       | 0.96 (0.51-1.79)       | 0.83 (0.63-1.09)<br>** | 1.52 (0.73-3.16)       | 0.99 (0.62-1.57)<br>**        |
| <b>Current exposure to unpiped water</b>        |                        |                        |                        |                        |                        |                               |
| No                                              | Reference              | Reference              | Reference              | Reference              | Reference              | Reference                     |
| Yes                                             | 1.11 (0.99-1.25)       | 1.05 (0.97-1.13)       | 0.84 (0.72-0.97)       | 0.87 (0.80-0.95)       | 1.81 (1.53-2.15)       | 1.73 (1.51-1.97)              |
| Unknown                                         | 1.03 (0.33-3.20)       | 0.76 (0.29-1.98)       | 0.64 (0.14-2.92)<br>*  | 0.80 (0.29-2.23)<br>** | 2.40 (0.50-11.5)<br>** | 0.65 (0.08-5.13)<br>**        |

|                                | <u>Any GERD</u>        |                        | <u>Mixed symptoms</u> |                        | <u>Heartburn alone</u> |                        |
|--------------------------------|------------------------|------------------------|-----------------------|------------------------|------------------------|------------------------|
|                                | Male<br>aOR (95% CI)   | Female<br>aOR (95% CI) | Male<br>aOR (95% CI)  | Female<br>aOR (95% CI) | Male<br>aOR (95% CI)   | Female<br>aOR (95% CI) |
| <b>Tooth loss</b>              |                        |                        |                       |                        |                        |                        |
| Less than predicted            | Reference              | Reference              | Reference             | Reference              | Reference              | Reference              |
| 1-8 excess tooth loss          | 0.90 (0.81-0.99)       | 0.90 (0.83-0.96)       | 0.93 (0.82-1.05)      | 0.95 (0.87-1.02)       | 0.82 (0.68-0.98)       | 0.76 (0.66-0.87)       |
| >9 excess tooth loss           | 1.03 (0.92-1.13)       | 0.95 (0.88-1.02)       | 1.03 (0.91-1.16)      | 0.98 (0.91-1.06)       | 1.01 (0.85-1.21)       | 0.85 (0.75-0.97)<br>** |
| <b>Ever smoked tobacco use</b> |                        |                        |                       |                        |                        |                        |
| No                             | Reference              | Reference              | Reference             | Reference              | Reference              | Reference              |
| Former                         | 1.11 (0.99-1.25)       | 1.30 (0.98-1.72)       | 1.13 (0.98-1.30)      | 1.35 (0.99-1.83)       | 1.06 (0.86-1.31)       | 1.13 (0.66-1.93)       |
| Current                        | 1.16 (1.04-1.29)<br>** | 1.06 (0.87-1.28)       | 1.10 (0.97-1.25)      | 1.10 (0.90-1.36)       | 1.27 (1.07-1.52)<br>** | 0.90 (0.63-1.29)       |
| <b>Ever opium use</b>          |                        |                        |                       |                        |                        |                        |
| No                             | Reference              | Reference              | Reference             | Reference              | Reference              | Reference              |
| Yes                            | 1.58 (1.43-1.74)**     | 1.49 (1.35-1.64)**     | 1.62 (1.45-1.82)**    | 1.55 (1.39-1.73)**     | 1.49 (1.26-1.75)**     | 1.29 (1.08-1.56)**     |
| <b>NSAID use</b>               |                        |                        |                       |                        |                        |                        |
| No                             | Reference              | Reference              | Reference             | Reference              | Reference              | Reference              |
| Yes                            | 1.25 (1.10-1.42)**     | 1.35 (1.24-1.46)**     | 1.25 (1.07-1.46)**    | 1.37 (1.25-1.50)**     | 1.25 (1.01-1.55)*      | 1.27 (1.09-1.47)**     |

Adjusted by age, urban residency, ethnicity, socioeconomic status, waist-to-hip ratio, body mass index, hot tea consumption, fruit and vegetable consumption, unpiped water exposure, tooth loss, tobacco smoking, opiate use, and non-steroidal anti-inflammatory drug use.

\*\* p<0.01, \*p<0.05

**Table S2b.** GERD Multivariable Logistic Regression, stratified by tobacco smoking

|                                                 | <u>Any GERD</u>                  |                               | <u>Mixed symptoms</u>            |                               | <u>Heartburn alone</u>           |                               |
|-------------------------------------------------|----------------------------------|-------------------------------|----------------------------------|-------------------------------|----------------------------------|-------------------------------|
|                                                 | <u>Nonsmoker</u><br>aOR (95% CI) | <u>Smoker</u><br>aOR (95% CI) | <u>Nonsmoker</u><br>aOR (95% CI) | <u>Smoker</u><br>aOR (95% CI) | <u>Nonsmoker</u><br>aOR (95% CI) | <u>Smoker</u><br>aOR (95% CI) |
| <b>Age, per 10 year increase</b>                | 1.05 (1.02-1.09)**               | 0.93 (0.87-0.99)*             | 1.06 (1.03-1.10)**               | 0.94 (0.87-1.01)              | 1.03 (0.97-1.08)                 | 0.92 (0.82-1.03)              |
| <b>Sex, n (%)</b>                               |                                  |                               |                                  |                               |                                  |                               |
| Male                                            | Reference                        | Reference                     | Reference                        | Reference                     | Reference                        | Reference                     |
| Female                                          | 2.26 (2.11-2.41)**               | 2.07 (1.73-2.47)**            | 2.49 (2.31-2.69)**               | 2.27 (1.87-2.77)**            | 1.73 (1.55-1.94)**               | 1.53 (1.10-2.13)*             |
| <b>Residence</b>                                |                                  |                               |                                  |                               |                                  |                               |
| Rural                                           | Reference                        | Reference                     | Reference                        | Reference                     | Reference                        | Reference                     |
| Urban                                           | 0.96 (0.89-1.04)                 | 1.13 (0.96-1.34)              | 0.82 (0.75-0.90)**               | 1.07 (0.87-1.30)              | 1.49 (1.29-1.71)**               | 1.33 (0.99-1.77)              |
| <b>Ethnicity</b>                                |                                  |                               |                                  |                               |                                  |                               |
| Turkmen                                         | Reference                        | Reference                     | Reference                        | Reference                     | Reference                        | Reference                     |
| Non-Turkmen                                     | 1.55 (1.46-1.65)**               | 1.49 (1.30-1.71)**            | 1.57 (1.47-1.68)**               | 1.58 (1.35-1.84)**            | 1.51 (1.36-1.69)**               | 1.29 (1.02-1.64)*             |
| <b>Socioeconomic status</b>                     |                                  |                               |                                  |                               |                                  |                               |
| 1 <sup>st</sup> quartile (lowest)               | Reference                        | Reference                     | Reference                        | Reference                     | Reference                        | Reference                     |
| 2 <sup>nd</sup> quartile                        | 0.92 (0.86-0.99)                 | 0.91 (0.78-1.06)              | 0.96 (0.89-1.04)                 | 0.88 (0.73-1.05)              | 0.83 (0.73-0.94)                 | 0.97 (0.74-1.27)              |
| 3 <sup>rd</sup> quartile                        | 0.88 (0.82-0.95)                 | 0.86 (0.74-1.00)              | 0.93 (0.86-1.01)                 | 0.84 (0.70-1.01)              | 0.76 (0.67-0.86)                 | 0.91 (0.70-1.20)              |
| 4 <sup>th</sup> quartile (highest)              | 0.66 (0.61-0.72)<br>**           | 0.62 (0.52-0.75)<br>**        | 0.67 (0.61-0.73)<br>**           | 0.58 (0.46-0.72)<br>**        | 0.66 (0.57-0.77)<br>**           | 0.74 (0.54-1.02)              |
| <b>BMI, n (%)</b>                               |                                  |                               |                                  |                               |                                  |                               |
| < 18.5                                          | 1.07 (0.94-1.22)                 | 1.15 (0.95-1.40)              | 1.10 (0.94-1.28)                 | 1.19 (0.95-1.49)              | 1.02 (0.81-1.30)                 | 1.09 (0.77-1.54)              |
| 18.5-24.9                                       | Reference                        | Reference                     | Reference                        | Reference                     | Reference                        | Reference                     |
| 25.0-29.9                                       | 0.91 (0.85-0.97)                 | 1.13 (0.96-1.32)              | 0.89 (0.82-0.96)                 | 1.06 (0.88-1.28)              | 0.97 (0.86-1.10)                 | 1.29 (0.99-1.69)              |
| >30                                             | 0.95 (0.88-1.03)                 | 1.03 (0.82-1.30)              | 0.95 (0.87-1.04)                 | 0.97 (0.74-1.27)              | 0.96 (0.83-1.11)                 | 1.18 (0.80-1.02)              |
| <b>WHR, per SD</b>                              | 1.07 (1.04-1.11) <sup>2</sup>    | 0.99 (0.92-1.07)              | 1.11 (1.07-1.15) <sup>2</sup>    | 1.01 (0.92-1.10)              | 0.99 (0.93-1.05)                 | 0.94 (0.83-1.07)              |
| <b>Temperature of tea consumed</b>              |                                  |                               |                                  |                               |                                  |                               |
| < 60° C                                         | Reference                        | Reference                     | Reference                        | Reference                     | Reference                        | Reference                     |
| ≥ 60° C                                         | 1.08 (1.03-1.14)                 | 0.91 (0.81-1.04)              | 1.03 (0.97-1.10)                 | 0.87 (0.75-1.00)              | 1.23 (1.12-1.36)                 | 1.03 (0.83-1.28)              |
| Unknown                                         | 1.55 (1.26-1.91)<br>**           | 0.78 (0.40-1.53)              | 1.64 (1.30-2.06)<br>*            | 0.88 (0.42-1.83)              | 1.28 (0.85-1.93)<br>**           | 0.43 (0.09-2.16)              |
| <b>Fruit and vegetable consumption, n (%)</b>   |                                  |                               |                                  |                               |                                  |                               |
| 1 <sup>st</sup> quintile (lowest)               | Reference                        | Reference                     | Reference                        | Reference                     | Reference                        | Reference                     |
| 2 <sup>nd</sup> quintile                        | 0.89 (0.82-0.96)                 | 0.81 (0.68-0.97)              | 0.90 (0.82-0.98)                 | 0.84 (0.69-1.03)              | 0.87 (0.76-0.99)                 | 0.75 (0.55-1.02)              |
| 3 <sup>rd</sup> quintile                        | 0.83 (0.77-0.90)                 | 0.80 (0.67-0.96)              | 0.85 (0.78-0.93)                 | 0.86 (0.70-1.05)              | 0.80 (0.69-0.92)                 | 0.67 (0.49-0.93)              |
| 4 <sup>th</sup> quintile                        | 0.77 (0.71-0.84)                 | 0.73 (0.61-0.88)              | 0.77 (0.71-0.85)                 | 0.68 (0.55-0.84)              | 0.76 (0.66-0.88)                 | 0.86 (0.64-1.17)              |
| 5 <sup>th</sup> quintile (highest)              | 0.69 (0.63-0.75)                 | 0.57 (0.47-0.69)              | 0.67 (0.60-0.74)                 | 0.51 (0.41-0.64)              | 0.75 (0.64-0.87)                 | 0.70 (0.51-0.95)              |
| Unknown                                         | 0.21 (0.16-0.29)<br>**           | 0.61 (0.13-0.54)<br>**        | 0.22 (0.16-0.32)<br>**           | 0.22 (0.09-0.55)<br>**        | 0.18 (0.09-0.36)<br>**           | 0.38 (0.12-1.21)              |
| <b>Current exposure to indoor air pollution</b> |                                  |                               |                                  |                               |                                  |                               |
| No                                              | Reference                        | Reference                     | Reference                        | Reference                     | Reference                        | Reference                     |
| Yes                                             | 0.98 (0.93-1.14)                 | 0.86 (0.76-0.97)              | 0.91 (0.85-0.97)                 | 0.84 (0.72-0.96)              | 1.23 (1.11-1.36)                 | 0.92 (0.74-1.14)              |
| Unknown                                         | 0.89 (0.71-1.62)                 | 1.13 (0.58-2.22)<br>*         | 0.85 (0.65-1.11)<br>**           | 0.97 (0.43-2.20)<br>*         | 1.05 (0.69-1.60)<br>**           | 1.47 (0.52-4.14)              |
| <b>Current exposure to unpiped water</b>        |                                  |                               |                                  |                               |                                  |                               |
| No                                              | Reference                        | Reference                     | Reference                        | Reference                     | Reference                        | Reference                     |
| Yes                                             | 1.07 (0.99-1.14)                 | 1.07 (0.91-1.25)              | 0.86 (0.79-0.94)                 | 0.84 (0.69-1.03)              | 1.78 (1.58-1.99)                 | 1.68 (1.31-2.16)              |
| Unknown                                         | 0.72 (0.32-1.62)                 | 2.23 (0.40-12.5)              | 0.65 (0.26-1.63)<br>**           | 1.53 (0.16-14.6)              | 0.94 (0.21-4.15)<br>**           | 6.07 (0.50-73.1)<br>**        |

|                       | <u>Any GERD</u>                  |                               | <u>Mixed symptoms</u>            |                               | <u>Heartburn alone</u>           |                               |
|-----------------------|----------------------------------|-------------------------------|----------------------------------|-------------------------------|----------------------------------|-------------------------------|
|                       | <b>Nonsmoker</b><br>aOR (95% CI) | <b>Smoker</b><br>aOR (95% CI) | <b>Nonsmoker</b><br>aOR (95% CI) | <b>Smoker</b><br>aOR (95% CI) | <b>Nonsmoker</b><br>aOR (95% CI) | <b>Smoker</b><br>aOR (95% CI) |
| <b>Tooth loss</b>     |                                  |                               |                                  |                               |                                  |                               |
| Less than predicted   | Reference                        | Reference                     | Reference                        | Reference                     | Reference                        | Reference                     |
| 1-8 excess tooth loss | 0.93 (0.87-0.99)                 | 0.81 (0.70-0.93)              | 0.98 (0.91-1.05)                 | 0.82 (0.69-0.97)              | 0.79 (0.70-0.89)                 | 0.77 (0.60-0.99)              |
| >9 excess tooth loss  | 0.98 (0.92-1.05)                 | 0.93 (0.81-1.72)              | 1.01 (0.94-1.09)                 | 0.92 (0.78-1.07)              | 0.90 (0.80-1.01)                 | 0.97 (0.77-1.22)              |
|                       |                                  |                               |                                  |                               | *                                |                               |
| <b>Ever opium use</b> |                                  |                               |                                  |                               |                                  |                               |
| No                    | Reference                        | Reference                     | Reference                        | Reference                     | Reference                        | Reference                     |
| Yes                   | 1.56 (1.43-1.69)**               | 1.49 (1.32-1.68)**            | 1.62 (1.47-1.78)**               | 1.52 (1.32-1.75)**            | 1.38 (1.18-1.60)**               | 1.43 (1.16-1.75)**            |
| <b>NSAID use</b>      |                                  |                               |                                  |                               |                                  |                               |
| No                    | Reference                        | Reference                     | Reference                        | Reference                     | Reference                        | Reference                     |
| Yes                   | 1.34 (1.24-1.45)**               | 1.23 (1.04-1.45)*             | 1.37 (1.26-1.49)**               | 1.18 (0.97-1.43)              | 1.25 (1.09-1.43)**               | 1.34 (1.02-1.76)*             |

Adjusted by age, sex urban residency, ethnicity, socioeconomic status, waist-to-hip ratio, body mass index, hot tea consumption, fruit and vegetable consumption, unpiped water exposure, tooth loss, opiate use, and non-steroidal anti-inflammatory drug use.

\*\* p<0.01, \*p<0.05

**Table S3.** ESCC Risk Analysis – GERD symptom severity and duration

|                                 | Overall           |                  |
|---------------------------------|-------------------|------------------|
|                                 | Crude HR (95% CI) | aHR (95% CI)     |
| <b>GERD symptom severity</b>    |                   |                  |
| No symptoms                     | Reference         | Reference        |
| Mild-moderate symptoms          | 0.83 (0.65-1.06)  | 0.87 (0.68-1.11) |
| Severe symptoms                 | 0.90 (0.60-1.34)  | 0.90 (0.60-1.36) |
| <b>GERD duration</b>            |                   |                  |
| No symptoms                     | Reference         | Reference        |
| < 1 year                        | 0.71 (0.46-1.10)  | 0.75 (0.48-1.17) |
| 1-5 years                       | 0.76 (0.56-1.03)  | 0.82 (0.60-1.11) |
| > 5 years                       | 1.01 (0.76-1.34)  | 1.04 (0.78-1.38) |
| <b>GERD severity + duration</b> |                   |                  |
| No symptoms                     | Reference         | Reference        |
| Mild-mod and < 1 year           | 0.73 (0.46-1.16)  | 0.77 (0.48-1.22) |
| Mild-mod and 1-5 years          | 0.74 (0.53-1.03)  | 0.79 (0.57-1.09) |
| Mild-mod and > 5 years          | 0.99 (0.73-1.34)  | 1.01 (0.74-1.37) |
| Severe and < 1 year             | 0.43 (0.11-1.74)  | 0.45 (0.11-1.81) |
| Severe and 1-5 years            | 0.85 (0.45-1.62)  | 0.89 (0.46-1.69) |
| Severe and > 5 years            | 1.10 (0.66-1.83)  | 1.07 (0.64-1.78) |

Adjusted by age, sex, ethnicity, socioeconomic status, body mass index, tobacco smoking, and opiate use.

\*\* p<0.01, \*p<0.05

|                                 | Male              |                  | Female            |                  |
|---------------------------------|-------------------|------------------|-------------------|------------------|
|                                 | Crude HR (95% CI) | aHR (95% CI)     | Crude HR (95% CI) | aHR (95% CI)     |
| <b>GERD symptom severity</b>    |                   |                  |                   |                  |
| No symptoms                     | Reference         | Reference        | Reference         | Reference        |
| Mild-moderate symptoms          | 0.76 (0.54-1.06)  | 0.81 (0.58-1.14) | 1.00 (0.70-1.43)  | 0.94 (0.65-1.34) |
| Severe symptoms                 | 0.99 (0.53-1.85)  | 0.98 (0.52-1.85) | 1.02 (0.60-1.75)  | 0.89 (0.52-1.53) |
| <b>GERD duration</b>            |                   |                  |                   |                  |
| No symptoms                     | Reference         | Reference        | Reference         | Reference        |
| < 1 year                        | 0.92 (0.50-1.69)  | 0.94 (0.51-1.74) | 0.66 (0.35-1.25)  | 0.63 (0.34-1.18) |
| 1-5 years                       | 0.67 (0.43-1.05)  | 0.75 (0.48-1.18) | 0.91 (0.59-1.41)  | 0.88 (0.57-1.36) |
| > 5 years                       | 0.95 (0.64-1.41)  | 1.06 (0.71-1.57) | 1.17 (0.78-1.75)  | 1.05 (0.70-1.58) |
| <b>GERD severity + duration</b> |                   |                  |                   |                  |
| No symptoms                     | Reference         | Reference        | Reference         | Reference        |
| Mild-mod and < 1 year           | 0.86 (0.45-1.66)  | 0.88 (0.45-1.69) | 0.74 (0.39-1.42)  | 0.70 (0.37-1.35) |
| Mild-mod and 1-5 years          | 0.67 (0.42-1.07)  | 0.73 (0.45-1.17) | 0.89 (0.56-1.42)  | 0.86 (0.54-1.37) |
| Mild-mod and > 5 years          | 0.85 (0.55-1.33)  | 0.93 (0.60-1.46) | 1.22 (0.79-1.89)  | 1.10 (0.72-1.71) |
| Severe and < 1 year             | 0.74 (0.10-5.34)  | 0.68 (0.09-4.88) | 0.37 (0.05-2.67)  | 0.34 (0.05-2.45) |
| Severe and 1-5 years            | 0.68 (0.22-2.16)  | 0.73 (0.23-2.32) | 1.12 (0.51-2.46)  | 1.01 (0.46-2.22) |
| Severe and > 5 years            | 1.35 (0.62-2.93)  | 1.31 (0.60-2.85) | 1.17 (0.60-2.30)  | 0.98 (0.50-1.94) |

Adjusted by age, ethnicity, socioeconomic status, body mass index, tobacco smoking, and opiate use.

\*\* p<0.01, \*p<0.05

**Table S4.** Sensitivity Analysis – Exclude all ESCC dx within 2 years after enrollment

|                        | <b>Overall</b>    |                  |
|------------------------|-------------------|------------------|
|                        | Crude HR (95% CI) | aHR (95% CI)     |
| <b>Any GERD</b>        | 0.84 (0.60-1.18)  | 0.86 (0.61-1.21) |
| <b>Mixed symptoms</b>  | 0.81 (0.55-1.21)  | 0.83 (0.56-1.24) |
| <b>Heartburn alone</b> | 0.92 (0.52-1.65)  | 0.94 (0.52-1.68) |

Adjusted by age, sex, ethnicity, socioeconomic status, body mass index, tobacco smoking, and opiate use.

\*\* p<0.01, \*p<0.05

|                        | <b>Male</b>       |                   | <b>Female</b>     |                  |
|------------------------|-------------------|-------------------|-------------------|------------------|
|                        | Crude HR (95% CI) | aHR (95% CI)      | Crude HR (95% CI) | aHR (95% CI)     |
| <b>Any GERD</b>        | 0.46 (0.23-0.94)* | 0.48 (0.23-0.98)* | 1.19 (0.80-1.78)  | 1.11 (0.74-1.67) |
| <b>Mixed symptoms</b>  | 0.34 (0.13-0.93)  | 0.36 (0.13-0.97)  | 1.20 (0.77-1.88)  | 1.10 (0.70-1.72) |
| <b>Heartburn alone</b> | 0.71 (0.26-1.93)  | 0.72 (0.26-1.94)  | 1.18 (0.58-2.43)  | 1.13 (0.55-2.32) |

Adjusted by age, ethnicity, socioeconomic status, body mass index, tobacco smoking, and opiate use.

\*\* p<0.01, \*p<0.05

|                        | <b>Never Smoker</b> |                  | <b>Ever Smoker</b> |                  |
|------------------------|---------------------|------------------|--------------------|------------------|
|                        | Crude HR (95% CI)   | aHR (95% CI)     | Crude HR (95% CI)  | aHR (95% CI)     |
| <b>Any GERD</b>        | 0.96 (0.67-1.37)    | 1.00 (0.70-1.44) | 0.35 (0.11-1.12)   | 0.31 (0.10-1.01) |
| <b>Mixed symptoms</b>  | 0.92 (0.61-1.39)    | 0.97 (0.64-1.47) | 0.34 (0.08-1.39)   | 0.28 (0.07-1.17) |
| <b>Heartburn alone</b> | 1.06 (0.58-1.96)    | 1.09 (0.59-2.01) | 0.37 (0.05-2.72)   | 0.38 (0.05-2.78) |

Adjusted by age, sex, ethnicity, socioeconomic status, body mass index, and opiate use.

\*\* p<0.01, \*p<0.05



**Table S5.** Sensitivity Analysis – Exclude all ESCC dx within 2 years after enrollment, but include all esophageal cancer tumors

|                        | <b>Overall</b>    |                  |
|------------------------|-------------------|------------------|
|                        | Crude HR (95% CI) | aHR (95% CI)     |
| <b>Any GERD</b>        | 0.90 (0.66-1.23)  | 0.92 (0.67-1.25) |
| <b>Mixed symptoms</b>  | 0.88 (0.62-1.26)  | 0.90 (0.62-1.29) |
| <b>Heartburn alone</b> | 0.96 (0.56-1.65)  | 0.97 (0.56-1.66) |

Adjusted by age, sex, ethnicity, socioeconomic status, body mass index, tobacco smoking, and opiate use.

\*\* p<0.01, \*p<0.05

|                        | <b>Male</b>       |                   | <b>Female</b>     |                  |
|------------------------|-------------------|-------------------|-------------------|------------------|
|                        | Crude HR (95% CI) | aHR (95% CI)      | Crude HR (95% CI) | aHR (95% CI)     |
| <b>Any GERD</b>        | 0.50 (0.26-0.95)* | 0.50 (0.26-0.95)* | 1.32 (0.91-1.92)  | 1.22 (0.84-1.78) |
| <b>Mixed symptoms</b>  | 0.44 (0.20-1.00)  | 0.44 (0.20-1.01)  | 1.31 (0.86-1.98)  | 1.18 (0.78-1.81) |
| <b>Heartburn alone</b> | 0.62 (0.23-1.67)  | 0.60 (0.22-1.63)  | 1.38 (0.72-2.64)  | 1.31 (0.68-2.51) |

Adjusted by age, ethnicity, socioeconomic status, body mass index, tobacco smoking, and opiate use.

\*\* p<0.01, \*p<0.05

|                        | <b>Never Smoker</b> |                  | <b>Ever Smoker</b> |                   |
|------------------------|---------------------|------------------|--------------------|-------------------|
|                        | Crude HR (95% CI)   | aHR (95% CI)     | Crude HR (95% CI)  | aHR (95% CI)      |
| <b>Any GERD</b>        | 1.07 (0.77-1.48)    | 1.11 (0.80-1.56) | 0.35 (0.13-0.98)   | 0.31 (0.11-0.86)* |
| <b>Mixed symptoms</b>  | 1.03 (0.70-1.50)    | 1.09 (0.73-1.59) | 0.39 (0.12-1.23)   | 0.31 (0.10-1.01)  |
| <b>Heartburn alone</b> | 1.18 (0.67-2.07)    | 1.20 (0.68-2.11) | 0.29 (0.04-2.07)   | 0.29 (0.04-2.08)  |

Adjusted by age, sex, ethnicity, socioeconomic status, body mass index, and opiate use.

\*\* p<0.01, \*p<0.05
